# Supplementary material for: “Liquid-like” type (COO−)2(H2O)10 anion water clusters in three-dimensional supramolecular structure of cucurbit[6]uril
Source: Royal Society of Chemistry journal article supplement (doi:10.1039/c2ce25444a), 2012-01-01
Supplement: c2ce25444a.pdf [file c2ce25444a.pdf]

## Materials and Measurements

All starting materials were purchased from commercial sources and used without further purification.  $^1\text{H}$  NMR spectra were recorded on a Varian Mercury VX-300 spectrometer. The IR spectra (in KBr pellets) were recorded on a Shimadzu FT-IR 157 spectrophotometer. ESI-MS measurement was performed on Thermo Finnigan LCQ advantage at room temperature. Thermogravimetric studies were carried out with a NETZSCH STA 449C at a heating rate of 5 K/min under nitrogen. X-ray powder diffractograms were measured (Cu KR) using a D/max-rA model Philips Analytical X-ray diffractometer.

### 1. Synthesis

**CB[6]** was prepared according to the literature.[1]

**1,1'-(hexane-1,6-diyl)dipyridinium-4-carboxylate(HBPC):** A solution of 20mmol of 1,6-dibromohexane dissolved in 20ml of acetonitrile was added dropwise, over a period of 1h, to a refluxing solution of 50mmol of the isonicotinate in 25ml of acetonitrile. After gentle refluxing for 3-4h, acetonitrile was removed in vacuo yielding a dark yellow solid, which was the product **1**(1,1'-(hexane-1,6-diyl)bis(4-ethoxycarbonylpyridinium bromide). Product **1** washed with acetone and dried under vacuum with yield of 85%[2]. The solution of product **1**(10mmol) was dissolved in 15% HCl (10ml) and refluxed for 5 h, then the solvent was removed in vacuum. The residue was solved in minimum amount of water and treated with 1, 2-epoxypropane until pH=7. After the solvent was removed under vacuum, the colorless product BPHC was obtained from recrystallization of the residue in  $\text{H}_2\text{O}/\text{EtOH}$  and dried under vacuum with yield of 68%[3].

**Pseudorotaxane:** A mixture of **CB[6]** (1.20 g, 1.20 mmol) and 1,1'-(hexane-1,6-diyl)-dipyridinium-4-carboxylate (0.328 g, 1.0 mmol) in water (30 ml) was heated at 80 °C for 8 h.

After stirring at room temperature over night, the residue of CB[6] was filtered off. The mixture heated at 120 °C in the reactor for 2 days, then slowly cooled to the room temperature and produced X-ray quality yellow crystals of pseudorotaxane with yield of 83%.

## 2. Characterization

**CB[6]:**  $^1\text{H}$  NMR (300 MHz, 0.2 mol/L NaCl / $\text{D}_2\text{O}$ )  $\delta$  4.269 (Hb, d, 12H,  $J=14.7$  Hz), 5.560 (Hc, s, 12H), 5.624 (Ha, d, 12H,  $J=16.2$  Hz); IR: (KBr)  $\nu/\text{cm}^{-1}$  1734 (C=O stretching frequency of CB[6], characteristic peak of CB[6] ), 3003, 2937 (C-H stretching frequency of bridged  $\text{CH}_2$ ); ESI-MS:  $m/z = 998.1$  [ $\text{CB}[6] + \text{H}$ ] $^+$ .

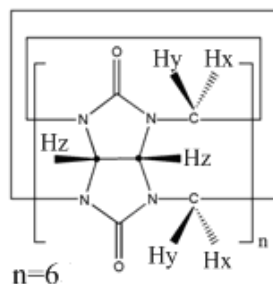

Figure1. The structure of CB[6].

**Product 1:**  $^1\text{H}$  NMR (300 MHz,  $\text{D}_2\text{O}$ )  $\delta$  1.258-1. (H1 and H7, m, 10H), 1.891 (H2, m, 4H), 4.318 (H6, q, 4H  $J_1=7.2$  Hz,  $J_2=7.5$  Hz,  $J_3=6.3$  Hz), 4.503 (H3, t, 4H  $J_1=7.5$  Hz,  $J_2=7.2$  Hz), 8.359 (H5, s, 4H  $J=5.7$  Hz), 8.874 (H4, s, 4H  $J=6.6$  Hz); IR: (KBr)  $\nu/\text{cm}^{-1}$  3118, 3051, 3113 (=C-H of pyridine), 2936 ( $\text{CH}_2$  of alkyl chain), 1724 (carboxylate, C=O), 1636 (C=N), 1573, 1458, 1369 (skeleton stretching frequency of pyridine), 1295 (C-O-C), 1114 (C-N $^+$ ); ESI-MS:  $m/z=497.2$  [ $\text{C}_{22}\text{H}_{30}\text{N}_2\text{O}_4\text{Br}^+ + \text{MeOH}$ ].

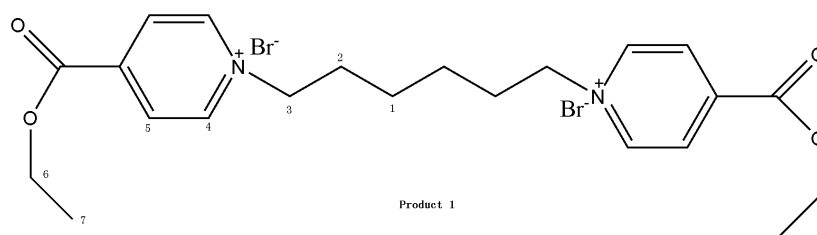

Figure 2. The structure of product **1**

**HBPC:**  $^1\text{H NMR}$  (300 MHz,  $\text{DMSO-}d_6$ )  $\delta$  1.275 (H1, m, 4H), 1.893 (H2, m, 4H), 4.518 (H3, t, 4H,  $J_1=7.5$  Hz,  $J_2=7.2$  Hz), 4.862 (H4, d, 4H  $J=6.6$  Hz) 8.176 (H5, s, 4H  $J=6.6$  Hz); IR: (KBr)  $\nu/\text{cm}^{-1}$  3042 (=C-H of pyridine), 2931, 2962 ( $\text{CH}_2$  of alkyl chain), 1644 (C=N, C=O, broad peak), 1513, 1450, 1395, 1346, 1254 (skeleton stretching frequency of pyridine), 1460 ([O-C-O] $^-$ ), 1159(C-N $^+$ ); ESI-MS:  $m/z=329.0$  [ $\text{Mr}+\text{H}$ ] $^+$ .

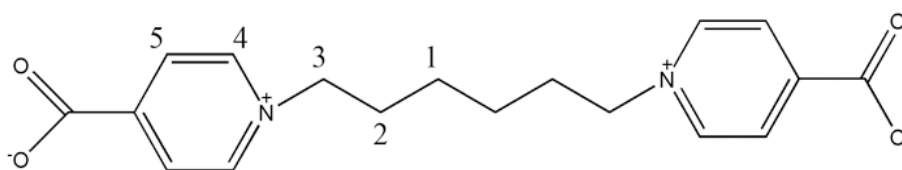

Figure 3. The structure of BPHC

**Pseudorotaxane:**  $^1\text{H NMR}$  (300 MHz, 0.2 mol/L NaCl/ $\text{D}_2\text{O}$ )  $\delta$  0.440(H1, m, 4H), 1.065 (H2, m, 4H), 4.381 (H3, t, 4H,  $J_1=9.3$  Hz,  $J_2=7.5$  Hz), 9.428 (H4, s, 4H,  $J=6.6\text{Hz}$ ), 8.215 (H5, s, 4H,  $J=6.6\text{Hz}$ ), 4.184 (Hb, d, 12H,  $J=15.6\text{Hz}$ ), 5.397 (Hc, s, 12H), 5.662 (Ha, d, 12H,  $J=16.2\text{Hz}$ ); IR (KBr)  $\nu/\text{cm}^{-1}$ :3459 (the O-H stretching frequency of water cluster), 1739 (C=O of CB[6]), 1620 (C=N stretching frequency of pyridine), 1470 ([O-C-O] $^-$ ), 1423, 1374, 1326, 1235 (skeleton stretching frequency of pyridine), 1189(C-N $^+$ ); ESI-MS:  $m/z=663.7$  [ $\text{Mr}+2\text{H}$ ] $^{2+}/2$ .

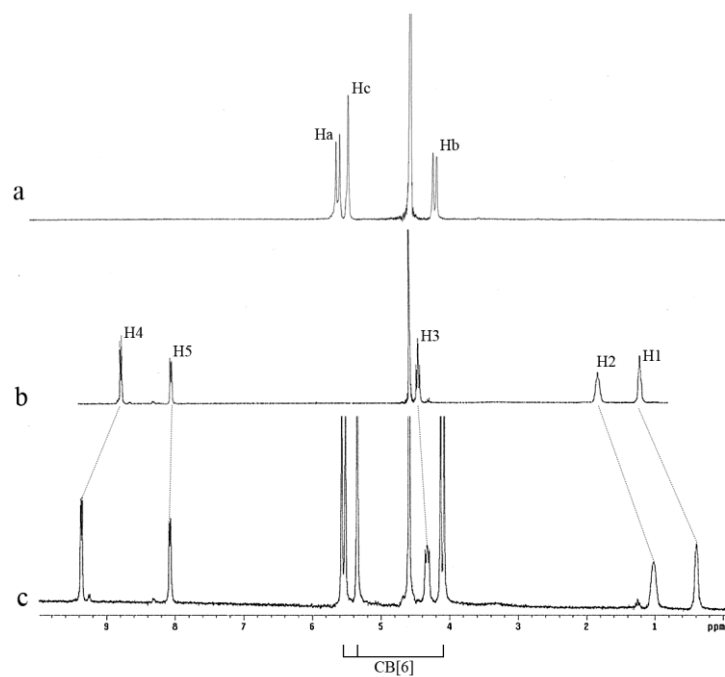

Figure 4. <sup>1</sup>H NMR spectra in 0.2 mol/L NaCl/D<sub>2</sub>O. a: the host molecular CB[6]. b: the guest molecule HBPC. c: the pseudorotaxane.

**IR of pseudorotaxane:**

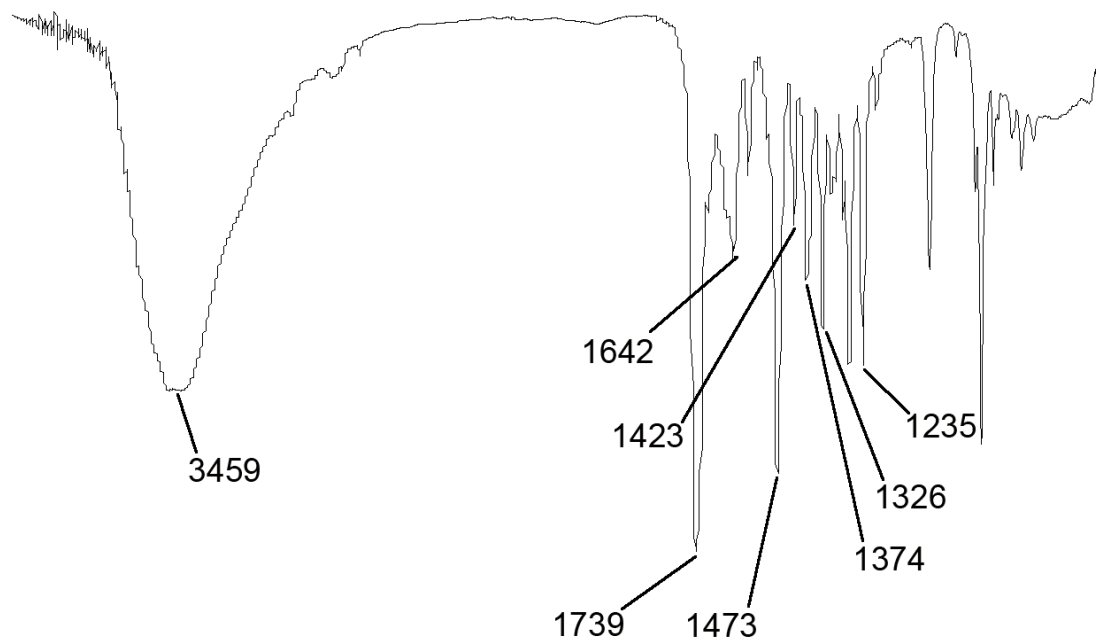

Figure 5. IR of pseudorotaxane.

**The TGA curve of Pseudorotaxane:**

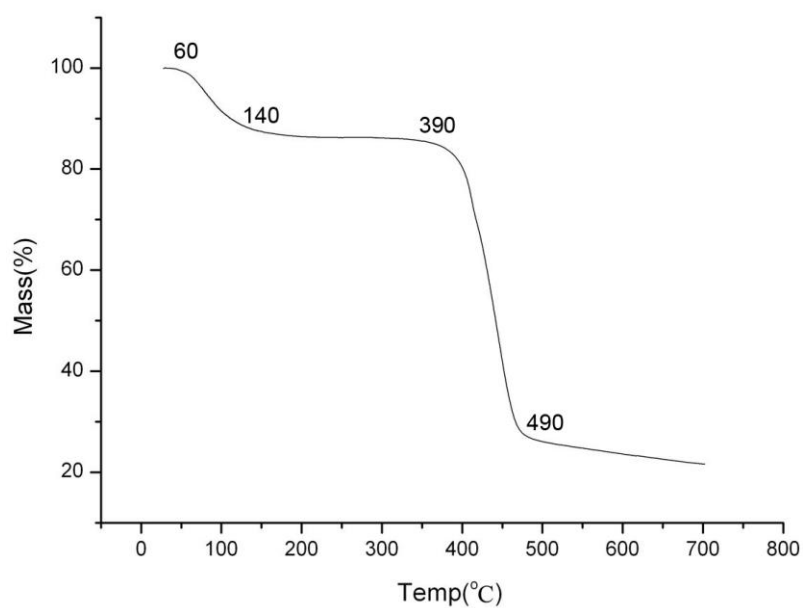

Figure 6. The TGA curve of pseudorotaxane in N<sub>2</sub> atmosphere.

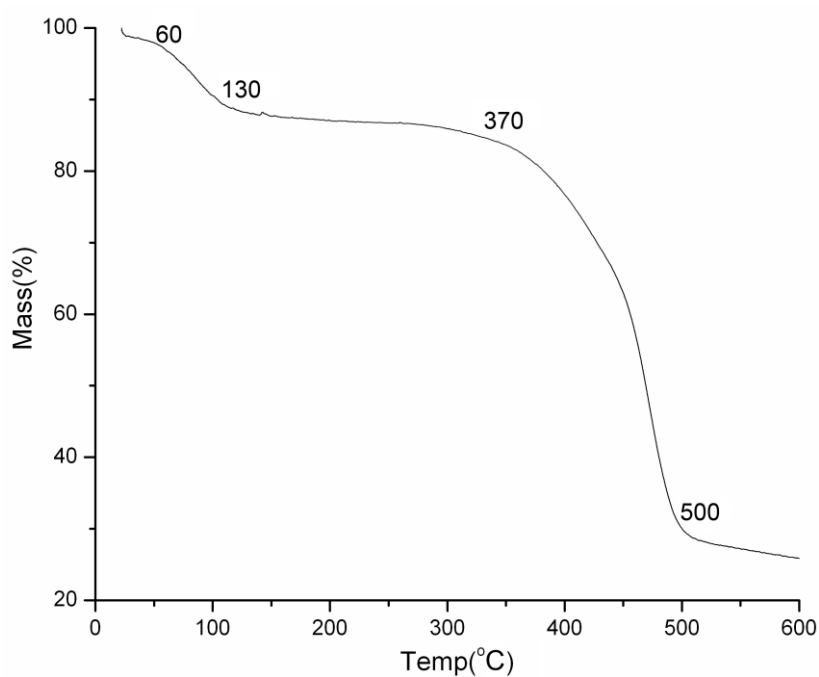

Figure 7. The TGA curve of rehydrated pseudorotaxane in N<sub>2</sub> atmosphere.

The TGA curve of the dehydrated sample placed in a humidity container for 3 days show that the mass loss is similar to the pseudorotaxane. A mass loss is observed at 60 to 130°C corresponding to the loss of twelve water molecules (14.0% calcd, 13.9% obsd). Heating from 130°C to 390°C, the platform implies the high stability of the host of pseudorotaxane. Heating

beyond 370°C, a more gradual mass loss occurs to 500 °C corresponding to the loss of pseudorotaxane.

### X-Ray Crystallography

The crystal structure of pseudorotaxane formed by CB[6] and BPHB was determined using a Bruker SMART APEX II CCD diffractometer with Mo KR radiation ( $\lambda$ ) 0.71073 Å at 200(2) K in the range of  $2.44^\circ < \theta < 27.58^\circ$ . The structure was solved by direct method (SHELXL-97) and refined against  $F^2$  in anisotropic approximation (SHELXL-97). More details of the crystal data are shown in Table 1.

Table 1. The crystal data of pseudorotaxane.

|                                        |                                                                                                                                          |
|----------------------------------------|------------------------------------------------------------------------------------------------------------------------------------------|
| Empirical formula                      | $C_{36}H_{36}N_{24}O_{12} + C_{18}H_{20}N_2O_4 + 12H_2O$                                                                                 |
| Formula weight                         | 1541.44                                                                                                                                  |
| Temperature                            | 200(2) K                                                                                                                                 |
| Wavelength                             | 0.71073 Å                                                                                                                                |
| Crystal system                         | Monoclinic                                                                                                                               |
| Space group                            | C2/c                                                                                                                                     |
| Unit cell dimensions                   | $a = 30.4423(12)$ Å $\alpha = 90^\circ$ .<br>$b = 12.3940(4)$ Å $\beta = 128.822(1)^\circ$ .<br>$c = 21.4045(8)$ Å $\gamma = 90^\circ$ . |
| Volume                                 | $6292.0(4)$ Å <sup>3</sup>                                                                                                               |
| Z                                      | 4                                                                                                                                        |
| Density (calculated)                   | 1.627 Mg/m <sup>3</sup>                                                                                                                  |
| Absorption coefficient                 | 0.333 mm <sup>-1</sup>                                                                                                                   |
| $F(000)$                               | 3240                                                                                                                                     |
| Crystal size                           | 0.16 x 0.10 x 0.10 mm <sup>3</sup>                                                                                                       |
| Theta range for data collection        | 2.44 to 27.58°.                                                                                                                          |
| Index ranges                           | $-32 \leq h \leq 36$ , $-14 \leq k \leq 14$ , $-25 \leq l \leq 25$                                                                       |
| Reflections collected                  | 22274                                                                                                                                    |
| Independent reflections                | 5515 [ $R(\text{int}) = 0.0550$ ]                                                                                                        |
| Completeness to $\theta = 27.00^\circ$ | 99.7 %                                                                                                                                   |
| Absorption correction                  | Multi-scan                                                                                                                               |
| Max. and min. transmission             | 0.9868 and 0.9790                                                                                                                        |
| Refinement method                      | Full-matrix least-squares on $F^2$                                                                                                       |
| Data / restraints / parameters         | 5515 / 0 / 487                                                                                                                           |
| Goodness-of-fit on $F^2$               | 1.042                                                                                                                                    |

|                                        |                                    |
|----------------------------------------|------------------------------------|
| Final $R$ indices [ $I > 2\sigma(I)$ ] | $R_1 = 0.0635$ , $wR_2 = 0.1831$   |
| $R$ indices (all data)                 | $R_1 = 0.0789$ , $wR_2 = 0.1949$   |
| Largest diff. peak and hole            | 0.630 and -0.965 e.Å <sup>-3</sup> |

Table 2. Hydrogen bonds of intramolecular for pseudorotaxane [Å and °]<sup>a</sup>

| D-H...A          | d(D-H) | d(H...A) | d(D...A) | <(DHA) |
|------------------|--------|----------|----------|--------|
| C21--H21...O4    | 0.9500 | 2.2200   | 3.127(3) | 160.00 |
| C22--H22...O3#1  | 0.9500 | 2.1600   | 3.082(4) | 162.00 |
| C24--H24A...O6   | 0.9900 | 2.4300   | 3.297(3) | 146.00 |
| C24--H24B...O1#1 | 0.9900 | 2.4600   | 3.362(5) | 151.00 |

<sup>a</sup>Symmetry transformations used to generate equivalent atoms: #1 1/2-x,3/2-y,2-z

Table 3. Hydrogen bonds of (COO)<sub>2</sub>(H<sub>2</sub>O)<sub>10</sub> anion water clusters [Å and °]<sup>a</sup>

| D-H...A           | d (D-H) | d (H...A) | d (D...A) | < (DHA) |
|-------------------|---------|-----------|-----------|---------|
| O9--H9B...O10     | 0.8200  | 2.1700    | 2.844(15) | 139.00  |
| O9--H9B...O12     | 0.8200  | 2.5700    | 3.204(7)  | 135.00  |
| O10--H10A...O6    | 0.8200  | 1.9800    | 2.775(14) | 162.00  |
| O10--H10B...O11#6 | 0.8200  | 2.0400    | 2.443(16) | 109.00  |
| O11--H11C...O7    | 0.8200  | 2.0200    | 2.797(6)  | 158.00  |
| O11--H11D...O13   | 0.8200  | 2.0630    | 2.841(7)  | 158.00  |
| O12--H12C...O10   | 0.8200  | 2.1600    | 2.644(17) | 118.00  |
| O12--H12C...O13   | 0.8200  | 2.1800    | 2.929(6)  | 152.00  |
| O12--H12D...O1#1  | 0.8200  | 2.1600    | 2.974(5)  | 170.00  |
| O13--H13B...O11#6 | 0.8200  | 2.5400    | 2.843(11) | 104.00  |

<sup>a</sup>Symmetry transformations used to generate equivalent atoms: #1 1/2-x,3/2-y,2-z, #6 x,1+y,z

Table 4. Hydrogen bonds of (H<sub>2</sub>O)<sub>2</sub> water clusters and C (1)-H (1)...O (9W), C (5)-H (5A)...O (7 acetate), C (6)-H (6B)...O (10W), C (7)-H (7)...O (11W), C (11)-H (11A)...O (14W), C (17)-H (17A)...O (12W), C (17)-H (17B)...O (14W) [Å and °]<sup>a</sup>

| D-H...A                         | d (D-H) | d (H...A) | d (D...A) | < (DHA) |
|---------------------------------|---------|-----------|-----------|---------|
| O(14 W)--H(14AW)...O2           | 0.8200  | 2.5100    | 3.011(3)  | 121.00  |
| O(14W)--H(14BW)...O(14W)        | 0.8200  | 2.6320    | 3.056(7)  | 113.00  |
| C (1)-H (1)...O (9W) #8         | 1.0000  | 2.5500    | 3.306(6)  | 132.00  |
| C (5)-H (5A)...O (7 acetate) #8 | 0.9900  | 2.5200    | 3.149(5)  | 122.00  |
| C (6)-H (6B)...O (10W) #9       | 0.9900  | 2.3900    | 3.355(16) | 165.00  |
| C (7)-H (7)...O (11W) #10       | 1.0000  | 2.3300    | 3.304(11) | 164.00  |

|                              |        |        |          |        |
|------------------------------|--------|--------|----------|--------|
| C (11)-H (11A)...O (14W) #6  | 0.9900 | 2.4400 | 3.395(4) | 162.00 |
| C (17)-H (17A)...O (12W) #11 | 0.9900 | 2.3200 | 3.270(6) | 161.00 |
| C (17)-H (17B)...O (14W) #1  | 0.9900 | 2.5800 | 3.548(4) | 164.00 |

---

<sup>a</sup>Symmetry transformations used to generate equivalent atoms: #1  $1/2-x, 3/2-y, 2-z$ , #6  $x, 1+y, z$ , #8  $x, 1-y, 1/2+z$ ,

#9  $-x, y, 3/2-z$ , #10  $-x, 1+y, 3/2-z$ , #11  $1/2-x, 1/2+y, 3/2-z$ .

## Reference

1. (a) J. Kim, I. S. Jung, S. Y. Kim, E. Lee, J. K. Kang, S. Sakamoto, K. Yamaguchi and K. Kim, *J. Am. Chem. Soc.*, 2000, **122**, 540-541. (b) A. I. Day, A. P. Arnold, R. J. Blanch and B. Snushall, *J. Org. Chem.*, 2001, **66**, 8094-8100. (c) F. J. Huo, C. X. Yin and P. Yang, *J. Incl. Phenom. Macrocycl. Chem.* 2006, **56**, 193-196. (d) Y. W. Yang, Y. Chen and Y. Liu, *Inorg. Chem.* 2006, **45**, 3014-3022.
2. F. H. Huang, C. Slebodnick, E. J. Mahan and H. W. Gibson, *Tetrahedron*, 2007, **63**, 2875-2881.
3. Y. Z. Zhao, S. L. Li, L. H. Weng, M. J. Zhang and Y. F. Xiao, *Chin. J. Inorg. Chem.* 2001, **17**, 691-698.
